# Supplementary material
Source: PubMed Central journal article supplement (PMC2952537)
Supplement: supp_cvq293_cvq293supp_figure_2.pdf [file supp_cvq293_cvq293supp_figure_2.pdf]

**Supplementary Figure-II: Sequencing results for mitochondrial targeted Cx43 expression vector (A) forward primer (B) reverse primer.**

A

```

Score = 1194 bits (621), Expect = 0.0
Identities = 621/621 (100%), Gaps = 0/621 (0%)
Strand=Plus/Minus
Query 1 ATGGGTGACTGGAGCGCCTTGGGGAAGCTGCTGGACAAGGTCCAAGCCTACTCCACGGCC 60
Sbjct 631 ATGGGTGACTGGAGCGCCTTGGGGAAGCTGCTGGACAAGGTCCAAGCCTACTCCACGGCC 572
Query 61 GGAGGGAAGGTGTGGCTGTGGTGTCTTTCATTTTCAGAATCCTGCTCCTGGGGACAGCG 120
Sbjct 571 GGAGGGAAGGTGTGGCTGTGGTGTCTTTCATTTTCAGAATCCTGCTCCTGGGGACAGCG 512
Query 121 GTTGAGTCAGCTTGGGGTGTGTAACAGTCTGCCTTTCGCTGTAACTCAACAACCCGGT 180
Sbjct 511 GTTGAGTCAGCTTGGGGTGTGTAACAGTCTGCCTTTCGCTGTAACTCAACAACCCGGT 452
Query 181 TGTGAAAATGTCTGCTATGACAAGTCTTCCCCATCTCTCAGGTGCGCTTCTGGGTCTT 240
Sbjct 451 TGTGAAAATGTCTGCTATGACAAGTCTTCCCCATCTCTCAGGTGCGCTTCTGGGTCTT 392
Query 241 CAGATCATATTCGTGTCTGTGCCACACTCCTGTACTTGGCTCAGGTGTTCTATGTGATG 300
Sbjct 391 CAGATCATATTCGTGTCTGTGCCACACTCCTGTACTTGGCTCAGGTGTTCTATGTGATG 332
Query 301 AGAAAAGGAAGAGAAGCTGAACAAGAAAGAAGAGGAGCTCAAAGTGGCGCAGACCCGCGG 360
Sbjct 331 AGAAAAGGAAGAGAAGCTGAACAAGAAAGAAGAGGAGCTCAAAGTGGCGCAGACCCGCGG 272
Query 361 GTC AACGTGGAGATGCACCTGAAGCAGATTGAAAATCAAGAAGTTC AAGTATGGGATTGAA 420
Sbjct 271 GTC AACGTGGAGATGCACCTGAAGCAGATTGAAAATCAAGAAGTTC AAGTATGGGATTGAA 212
Query 421 GAACACGGCAAGGTGAAGATGAGAGGTGGCCTGCTGAGAACCTACATCATCAGCATCCTC 480
Sbjct 211 GAACACGGCAAGGTGAAGATGAGAGGTGGCCTGCTGAGAACCTACATCATCAGCATCCTC 152
Query 481 TTC AAGTCTGTCTTCGAGGTGGCCTTCTGCTGATCCAGTGGTACATCTATGGGTT CAGC 540
Sbjct 151 TTC AAGTCTGTCTTCGAGGTGGCCTTCTGCTGATCCAGTGGTACATCTATGGGTT CAGC 92
Query 541 CTGAGTGC GGTCACACCTGCAAGAGAGATCCCTGCCCCCACCAGGTGGACTGCTTCTCT 600
Sbjct 91 CTGAGTGC GGTCACACCTGCAAGAGAGATCCCTGCCCCCACCAGGTGGACTGCTTCTCT 32
Query 601 TCACGTCCCACGGAGAAAACC 621
Sbjct 31 TCACGTCCCACGGAGAAAACC 11

CPU time: 0.05 user secs. 0.02 sys. secs 0.07 total secs.

```

B

```

Score = 1294 bits (673), Expect = 0.0
Identities = 680/681 (99%), Gaps = 1/681 (0%)
Strand=Plus/Plus
Query 469 ATCAGCATCCTCTTCAAGTCTGTCTTCGAGGTGGCCTTCTGCTGATCCAGTGGTACATC 528
Sbjct 12 ATCAGCATCCTCTTCA-GTCTGTCTTCGAGGTGGCCTTCTGCTGATCCAGTGGTACATC 70
Query 529 TATGGGTT CAGCCTGAGTGC GGTCACACCTGCAAGAGAGATCCCTGCCCCCACCAGGTG 588
Sbjct 71 TATGGGTT CAGCCTGAGTGC GGTCACACCTGCAAGAGAGATCCCTGCCCCCACCAGGTG 130
Query 589 GACTGCTT CCTCTCACGTCCCACGGAGAAAACCATCTTCATCATCTTCATGCTGGTGGTG 648
Sbjct 131 GACTGCTT CCTCTCACGTCCCACGGAGAAAACCATCTTCATCATCTTCATGCTGGTGGTG 190
Query 649 TCCTTGGTGTCTCTCGCTCTGAATATCATTGAGTCTTCTATGTCTTCTTCAAGGGCGTT 708
Sbjct 191 TCCTTGGTGTCTCTCGCTCTGAATATCATTGAGTCTTCTATGTCTTCTTCAAGGGCGTT 250
Query 709 AAGGATCGCGTGAAGGGAAGAAGCGATCCTTACCACGCCACCACCGGCCACTGAGCCCA 768
Sbjct 251 AAGGATCGCGTGAAGGGAAGAAGCGATCCTTACCACGCCACCACCGGCCACTGAGCCCA 310
Query 769 TCCAAAGACTGCGGATCTCCAAAATATGCTTACTTCAATGGTGCTCCTCACCAACGGCC 828
Sbjct 311 TCCAAAGACTGCGGATCTCCAAAATATGCTTACTTCAATGGTGCTCCTCACCAACGGCC 370
Query 829 CCACTCTCACCTATGTCTCCTCCTGGGTACAAGCTGGTCACTGGTGACAGAAAACAATTCC 888
Sbjct 371 CCACTCTCACCTATGTCTCCTCCTGGGTACAAGCTGGTCACTGGTGACAGAAAACAATTCC 430
Query 889 TCCTGCCGCAATTACAACAAGCAAGCCAGCGAGCAAAAACCTGGGCGAATTACAGCGCAGAG 948
Sbjct 431 TCCTGCCGCAATTACAACAAGCAAGCCAGCGAGCAAAAACCTGGGCGAATTACAGCGCAGAG 490
Query 949 CAAAATCGAATGGGGCAGGCCGGAAGCACCATCTCCAACCTCCCACGCCAGCCGTTTGAT 1008
Sbjct 491 CAAAATCGAATGGGGCAGGCCGGAAGCACCATCTCCAACCTCCCACGCCAGCCGTTTGAT 550
Query 1009 TTCCCTGACGACAGCCAAAATGCCAAAAAAGTTGCTGCTGGACACGAACCTCAGCCCTTA 1068
Sbjct 551 TTCCCTGACGACAGCCAAAATGCCAAAAAAGTTGCTGCTGGACACGAACCTCAGCCCTTA 610
Query 1069 GCTATCGTGGATCAGCGACCTTCCAGCAGAGCCAGCAGCCGCGCCAGCAGCAGACCTCGG 1128
Sbjct 611 GCTATCGTGGATCAGCGACCTTCCAGCAGAGCCAGCAGCCGCGCCAGCAGCAGACCTCGG 670
Query 1129 CCTGATGACCTGGAGATTTAA 1149
Sbjct 671 CCTGATGACCTGGAGATTTAA 691

```
