# Supplementary material
Source: PubMed Central journal article supplement (PMC2952537)

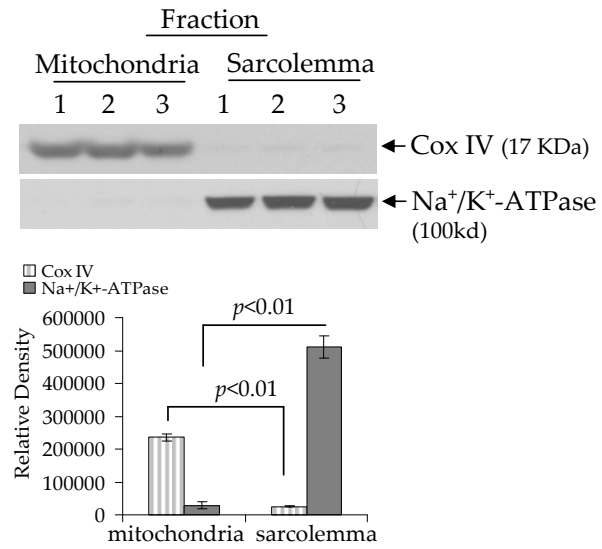

Supplement: supp_cvq293_cvq293supp_figure_1.pdf [file supp_cvq293_cvq293supp_figure_1.pdf]
